# Supplementary material for: Multiple preferred escape trajectories are explained by a geometric model incorporating prey’s turn and predator attack endpoint
Source: eLife journal article supplement (doi:10.7554/elife.77699), 2023-02-15

**A** $R_{\text{turn}}=5\text{ mm}$ 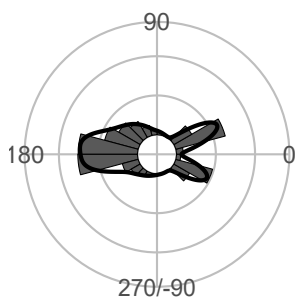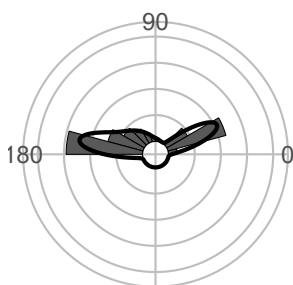**B** $R_{\text{turn}}=10\text{ mm}$ 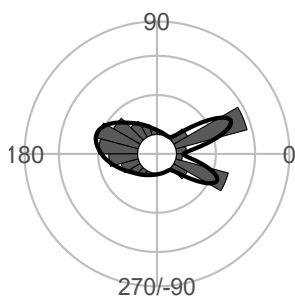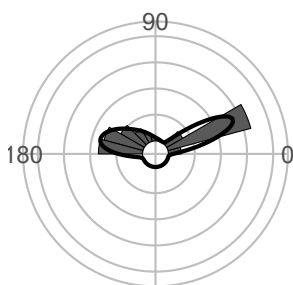**C** $R_{\text{turn}}=30\text{ mm}$ 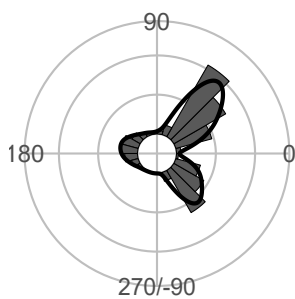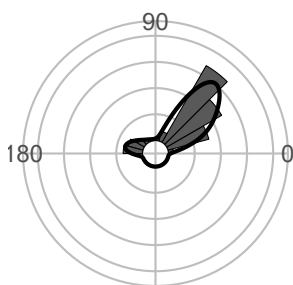**D** $R_{\text{turn}}=50\text{ mm}$ 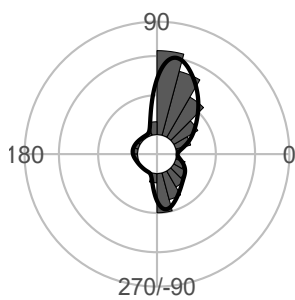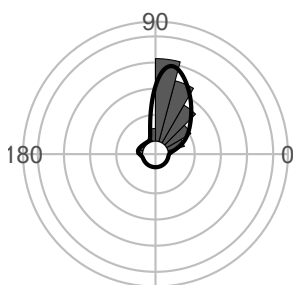**E** $R_{\text{turn}}=100\text{ mm}$ 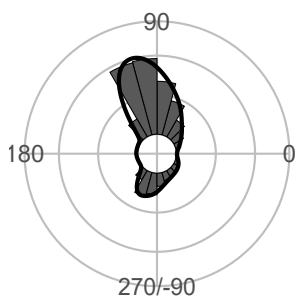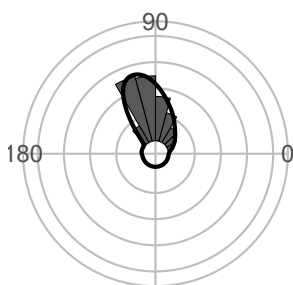

Supplement: supp [file elife-77699-supp-v1.zip]
