# Supplementary material for: Multiple preferred escape trajectories are explained by a geometric model incorporating prey’s turn and predator attack endpoint
Source: eLife journal article supplement (doi:10.7554/elife.77699), 2023-02-15

**A** $D_{\text{attack}} = 100 \text{ mm}$ 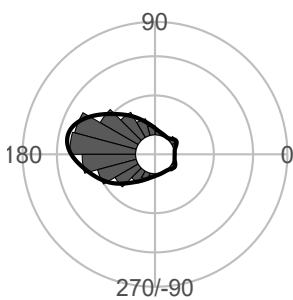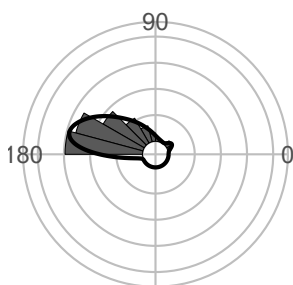**B** $D_{\text{attack}} = 200 \text{ mm}$ 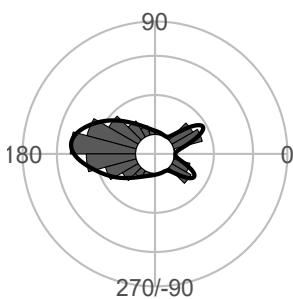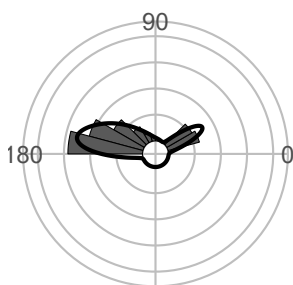**C** $D_{\text{attack}} = 300 \text{ mm}$ 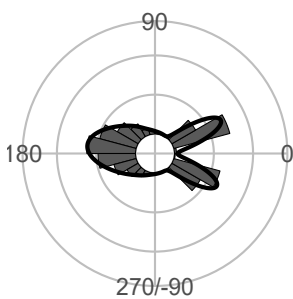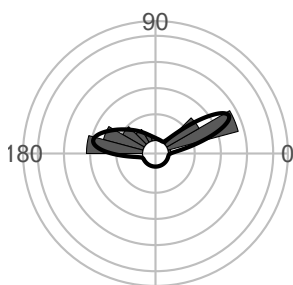**D** $D_{\text{attack}} = 400 \text{ mm}$ 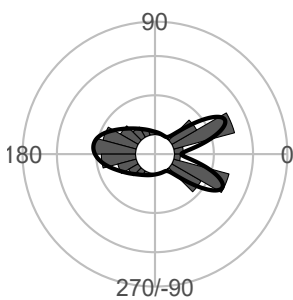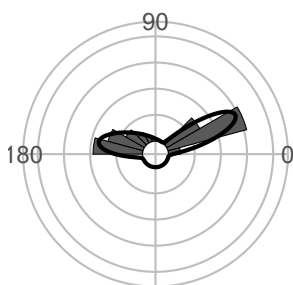**E** $D_{\text{attack}} = 500 \text{ mm}$ 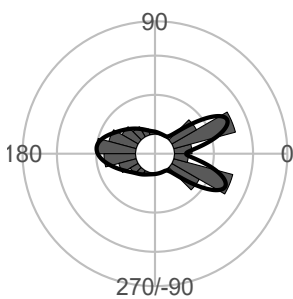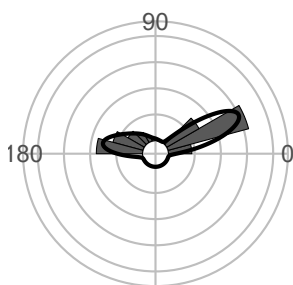

Supplement: supp [file elife-77699-supp-v1.zip]
