# Supplementary figures and images for: Multiple preferred escape trajectories are explained by a geometric model incorporating prey’s turn and predator attack endpoint
Source: eLife journal article supplement (doi:10.7554/elife.77699), 2023-02-15

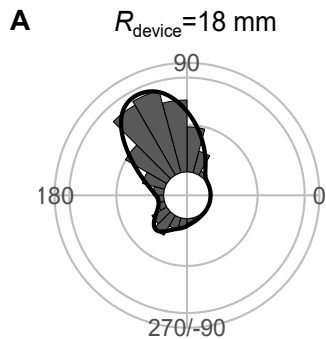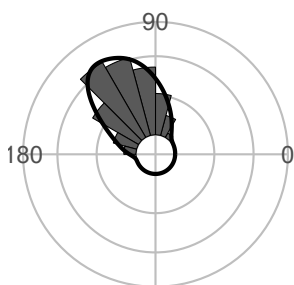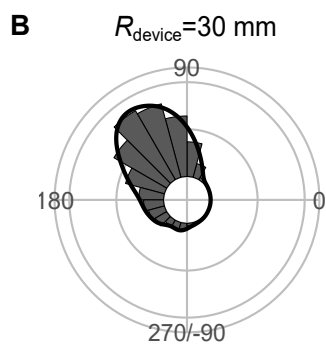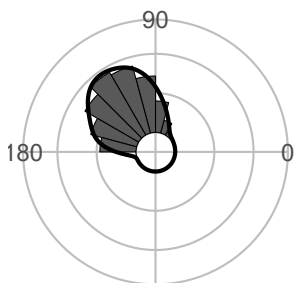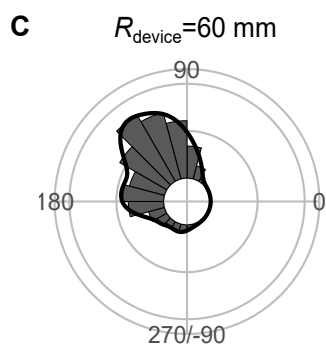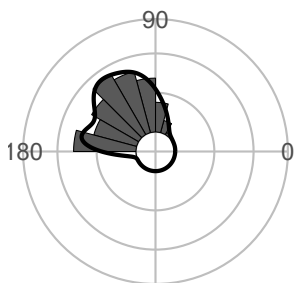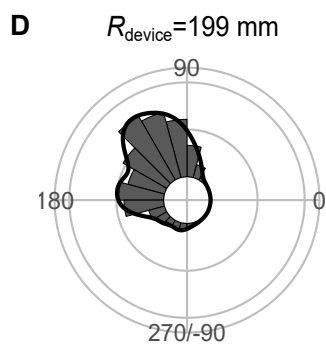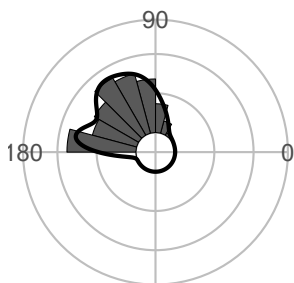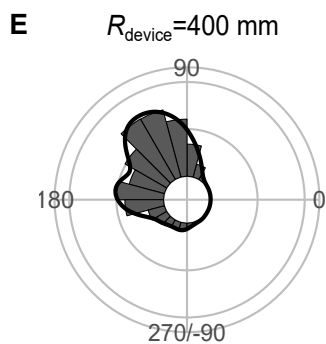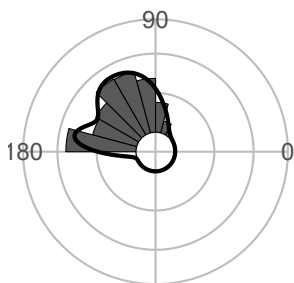

Supplement: supp [file elife-77699-supp-v1.zip]

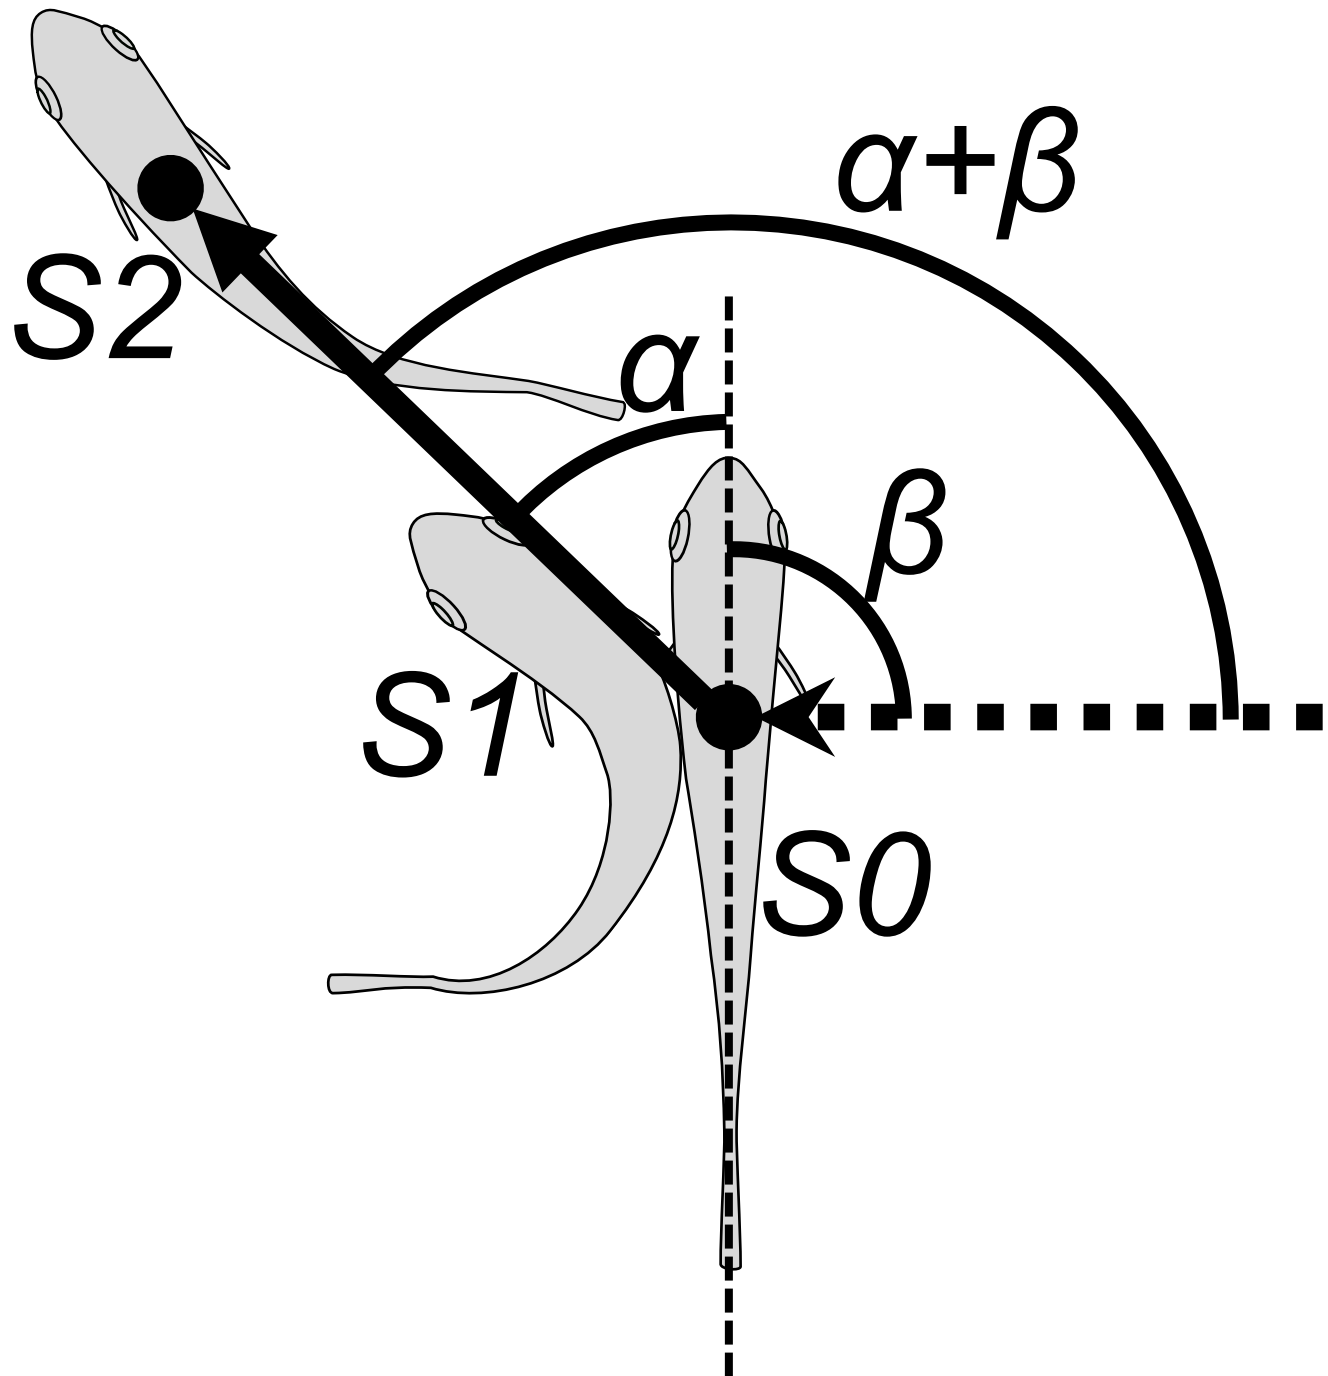

Supplement: supp [file elife-77699-supp-v1.zip]

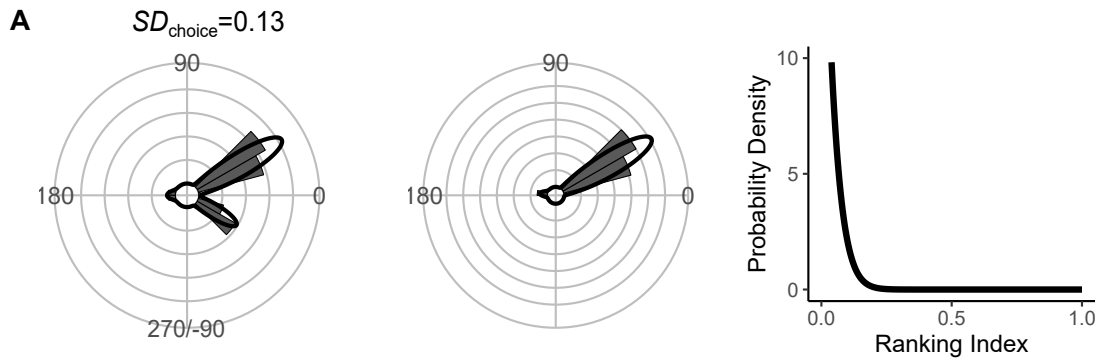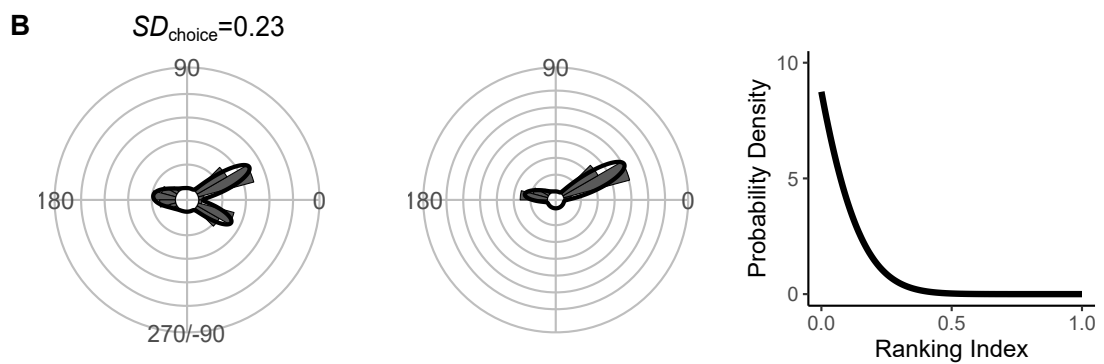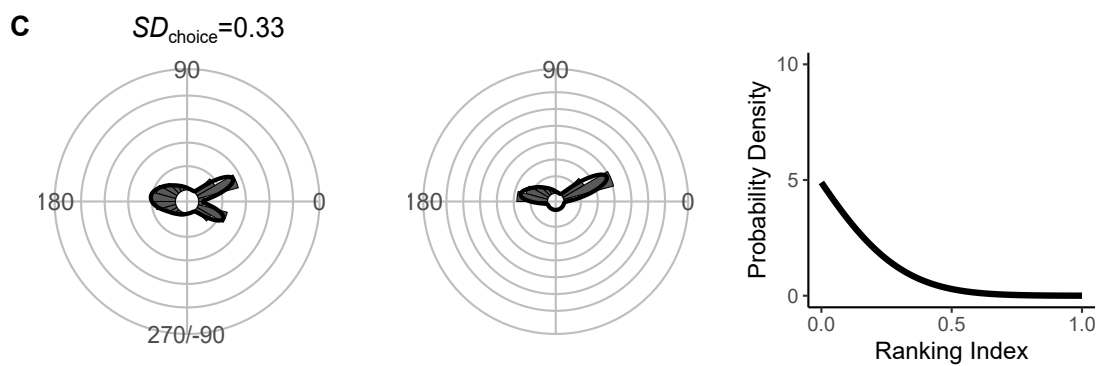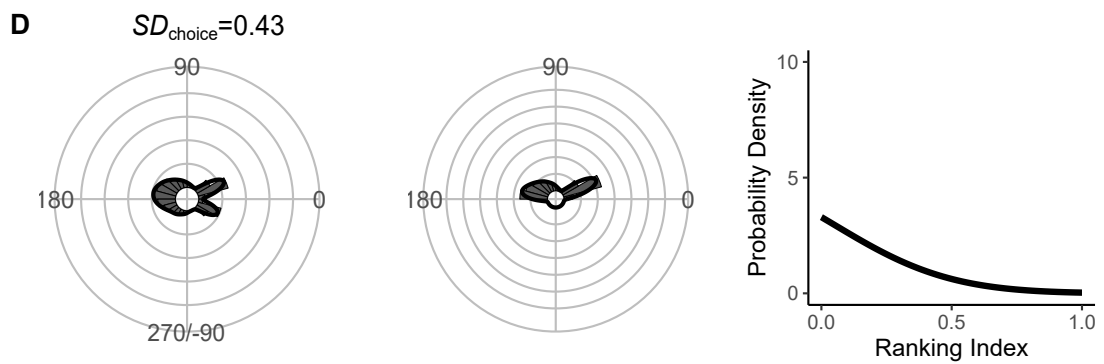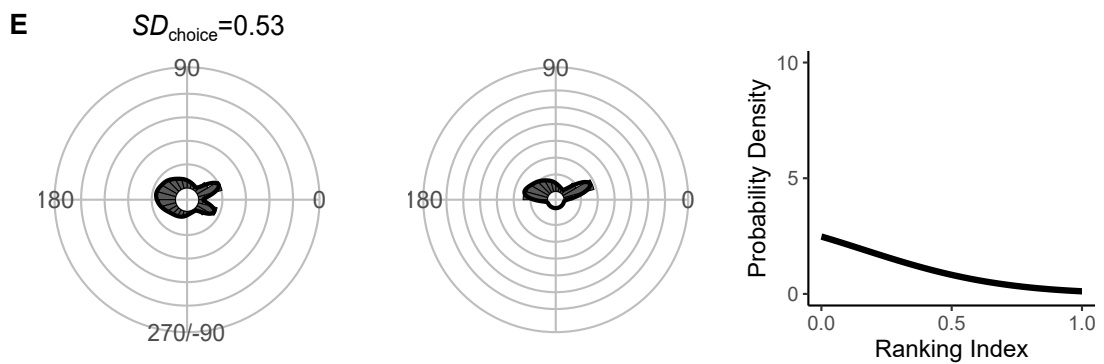

Supplement: supp [file elife-77699-supp-v1.zip]

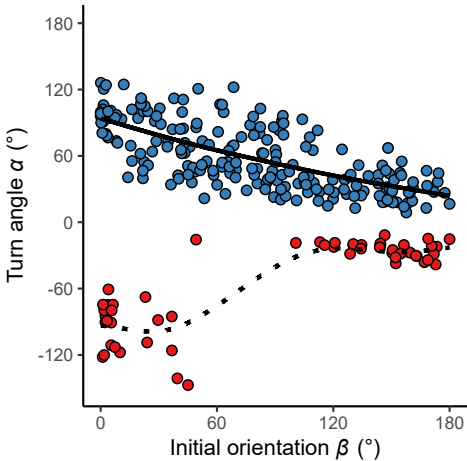

Supplement: supp [file elife-77699-supp-v1.zip]

**A** $K=0.3$ 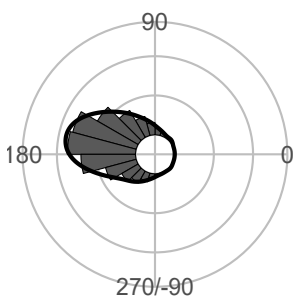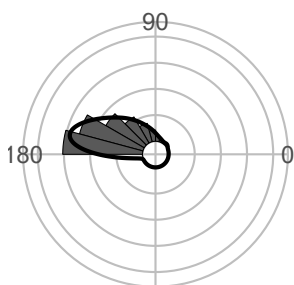**B** $K=1.2$ 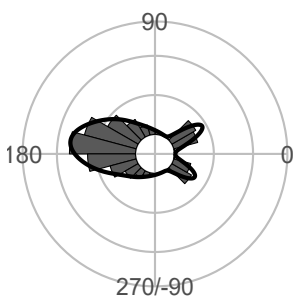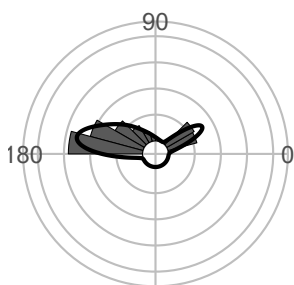**C** $K=1.48$ 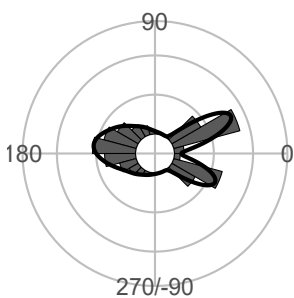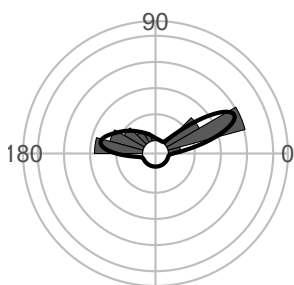**D** $K=1.8$ 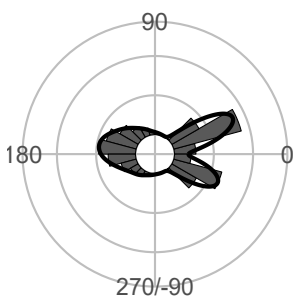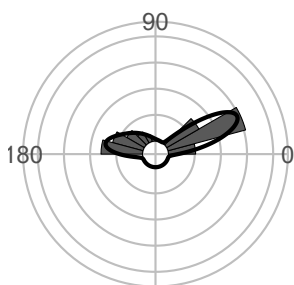**E** $K=7.5$ 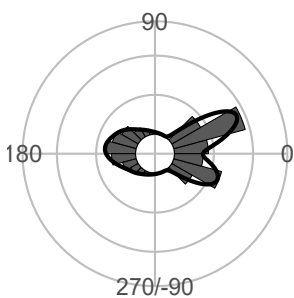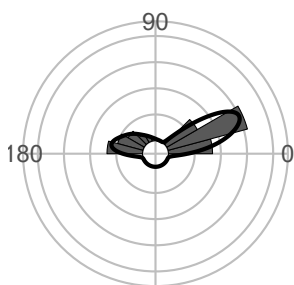

Supplement: supp [file elife-77699-supp-v1.zip]

**A**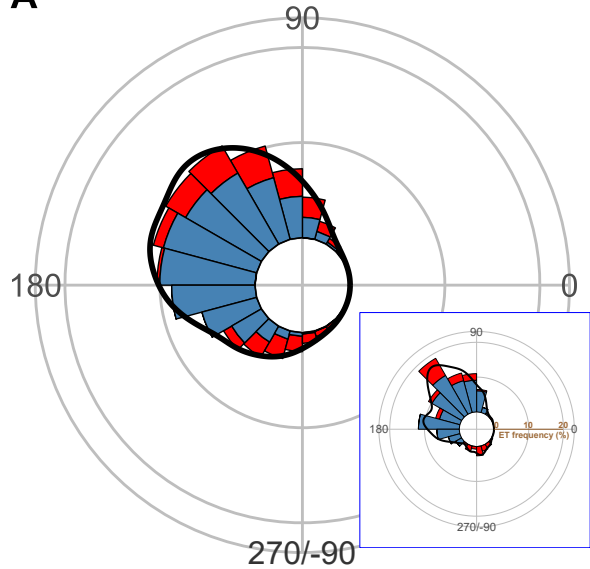**B**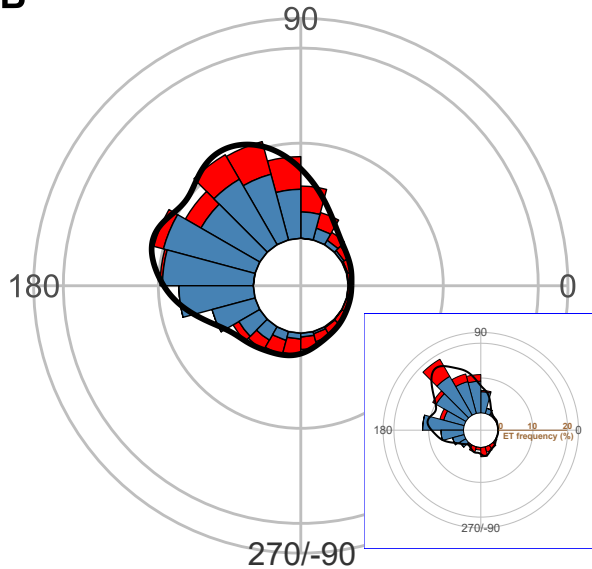

Supplement: supp [file elife-77699-supp-v1.zip]

**A** $D_{\text{attack}}=0$  mm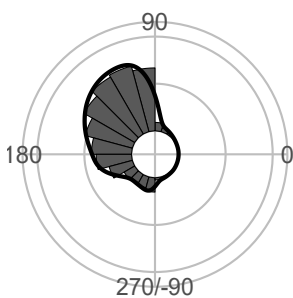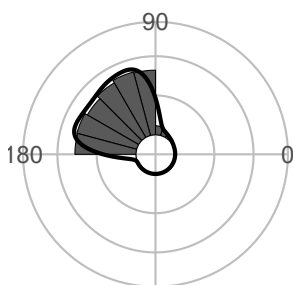**B** $D_{\text{attack}}=25$  mm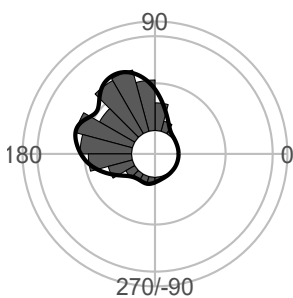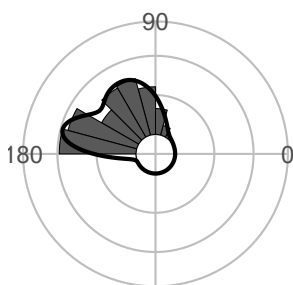**C** $D_{\text{attack}}=35$  mm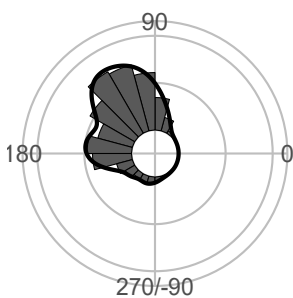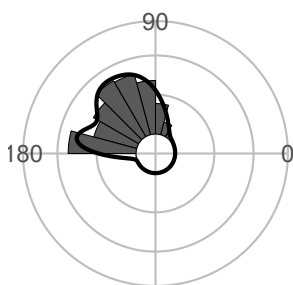**D** $D_{\text{attack}}=45$  mm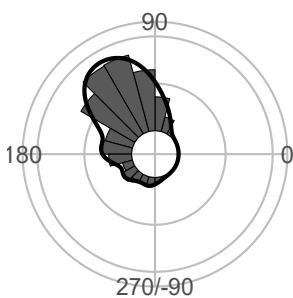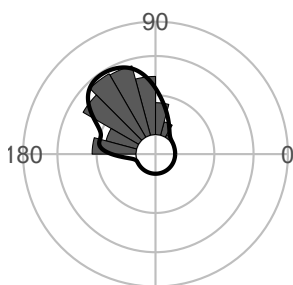**E** $D_{\text{attack}}=\text{Inf}$ 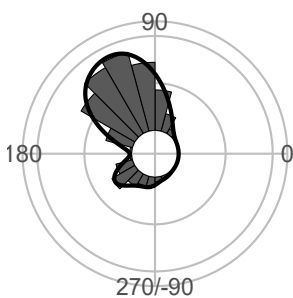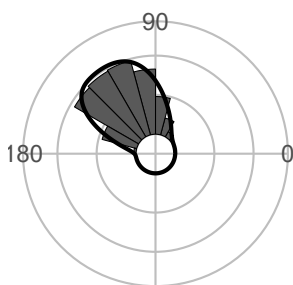

Supplement: supp [file elife-77699-supp-v1.zip]

**A**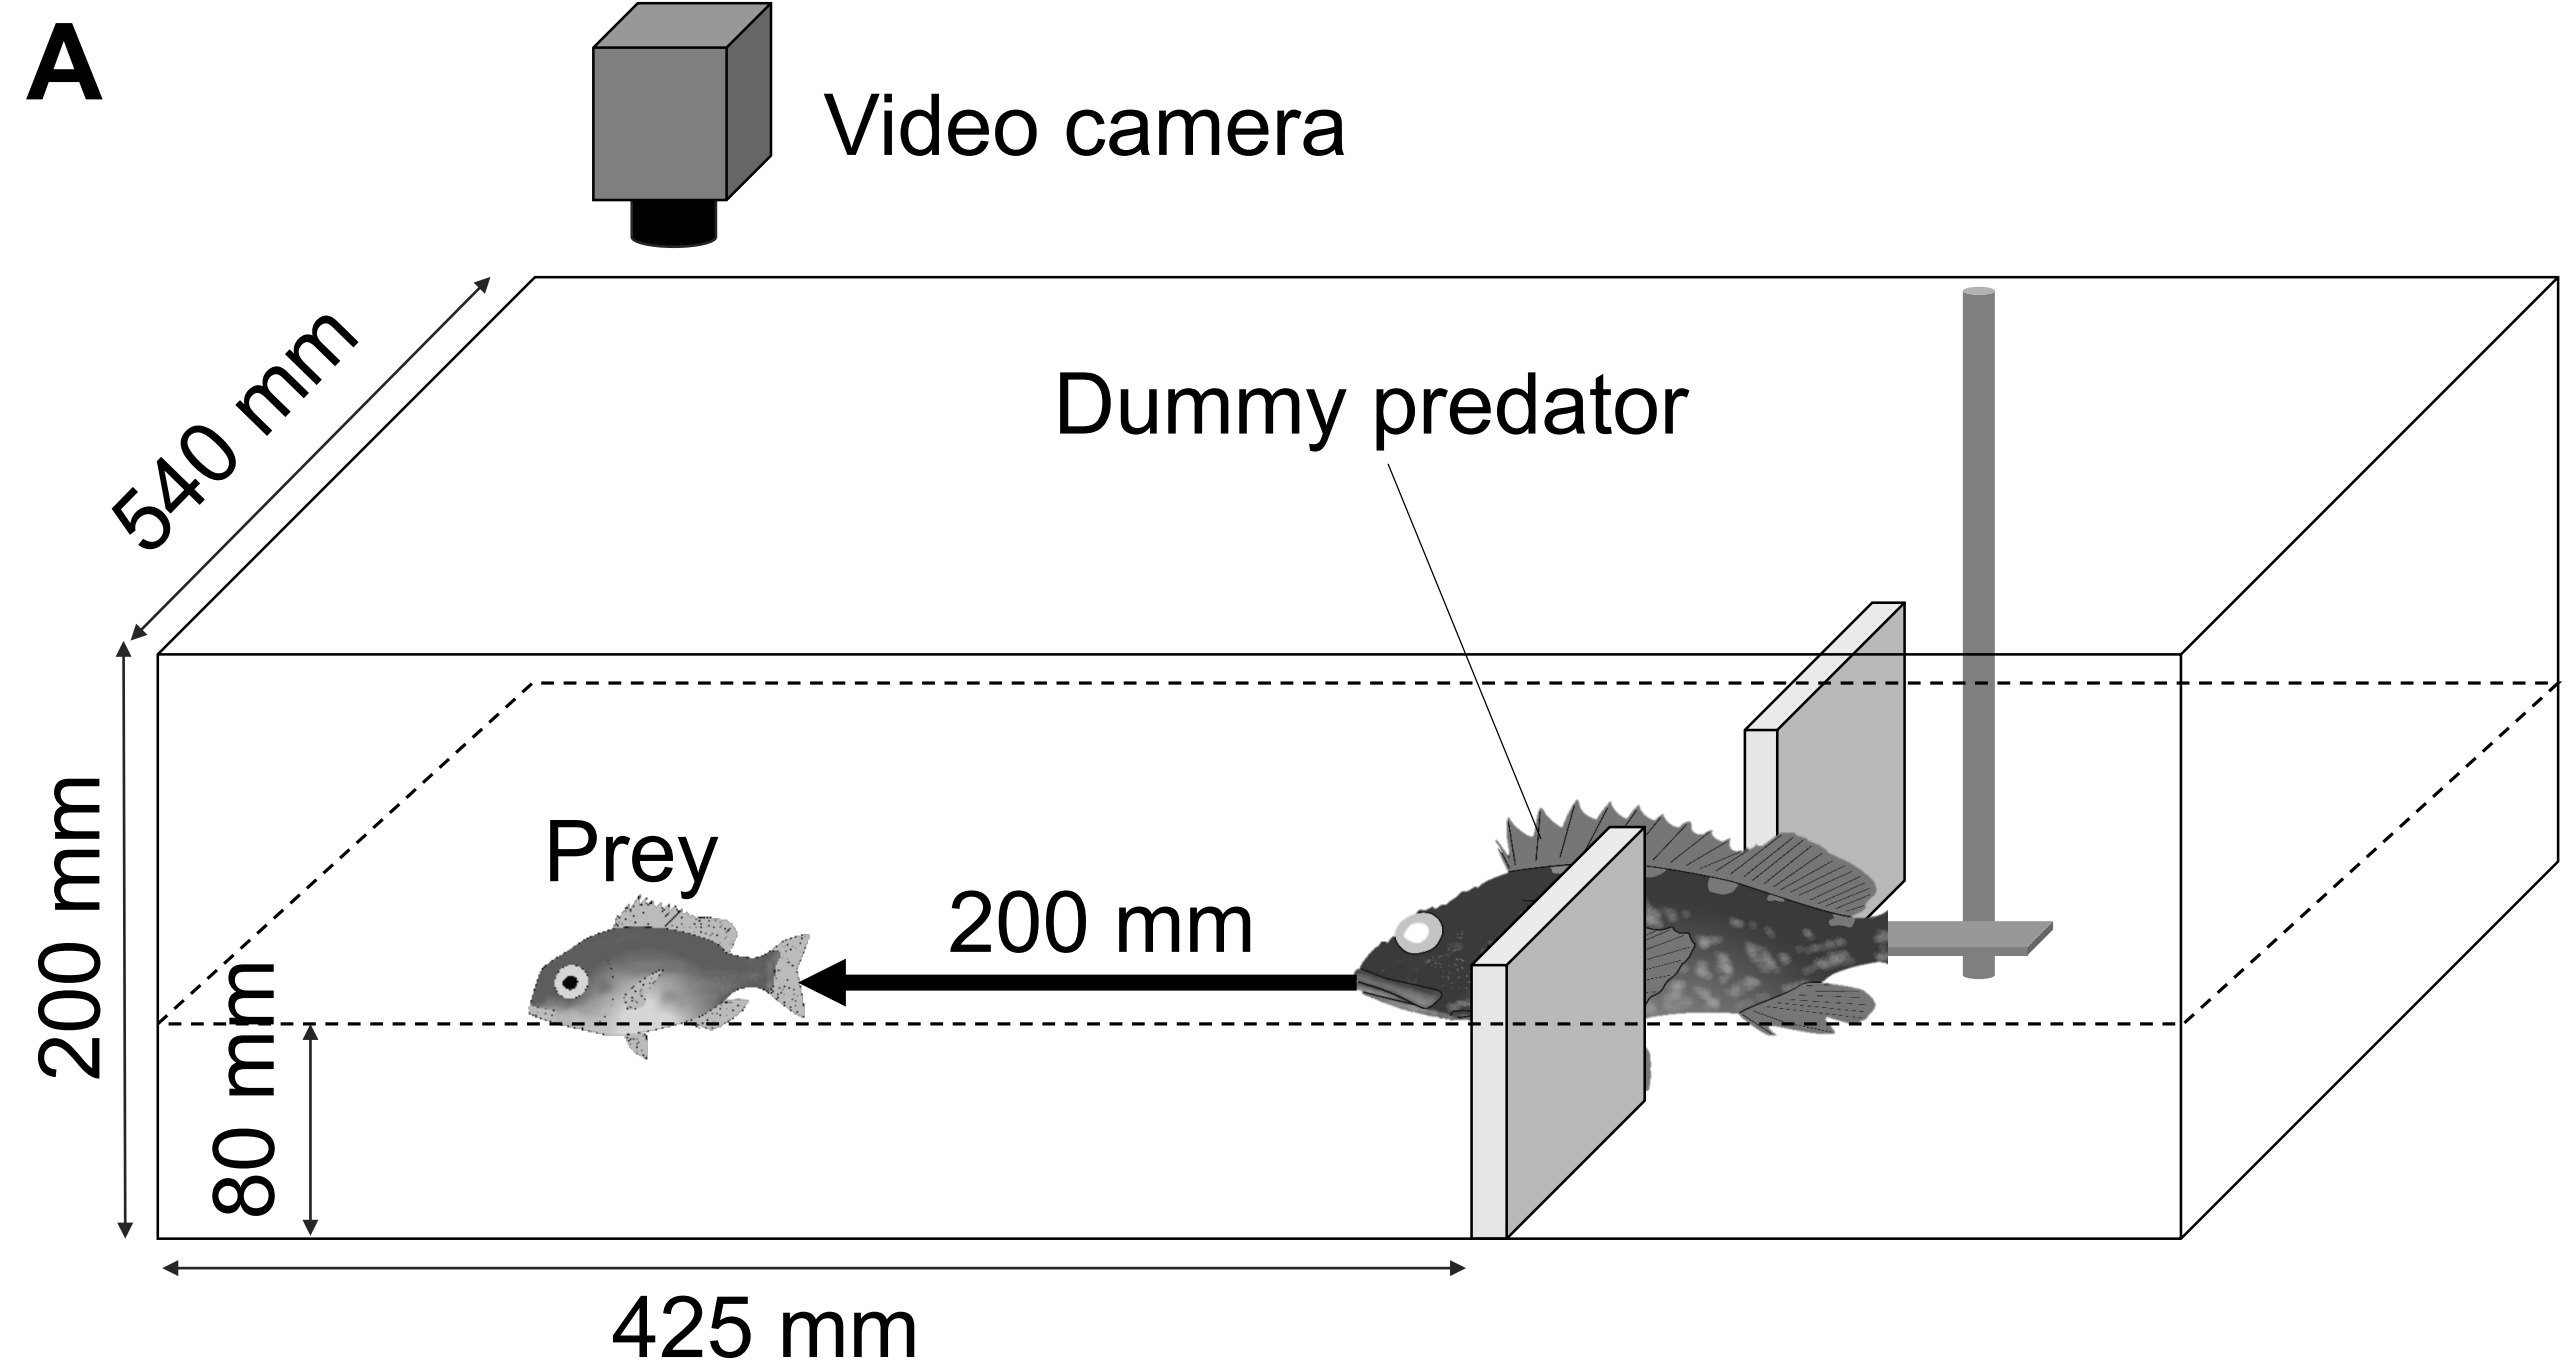**B**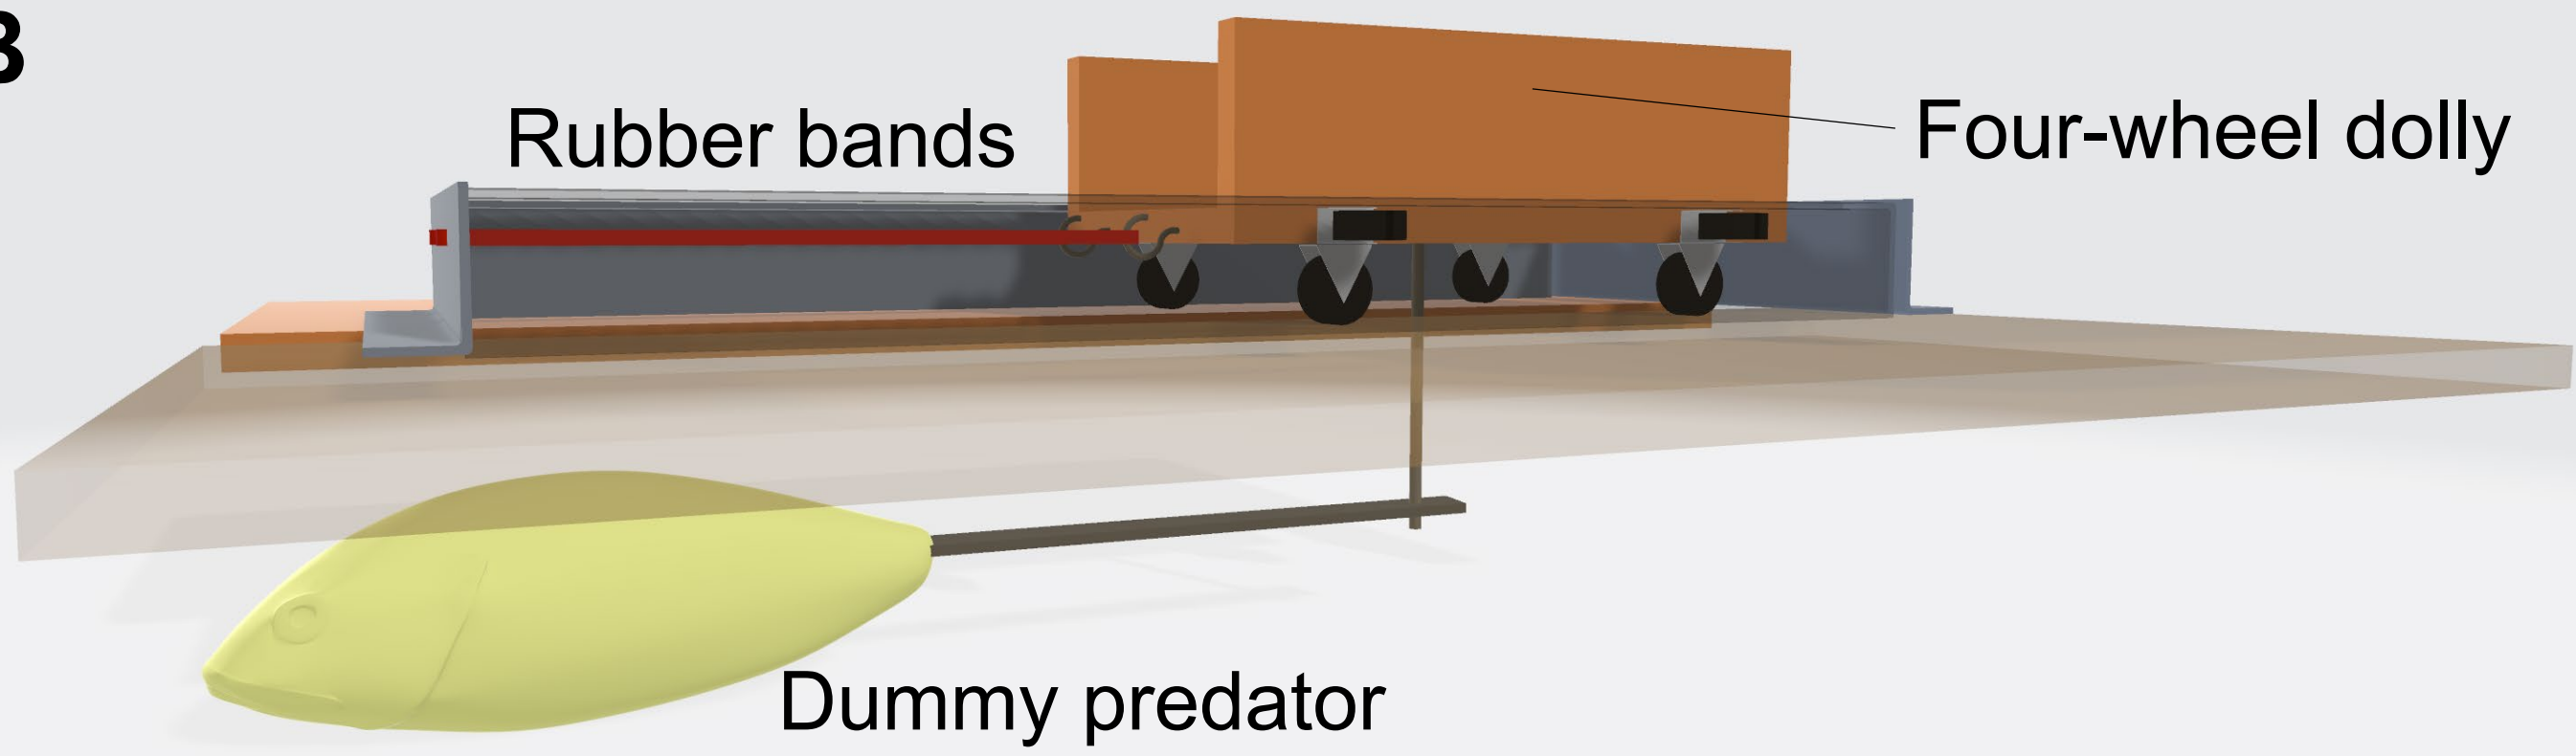

Supplement: supp [file elife-77699-supp-v1.zip]

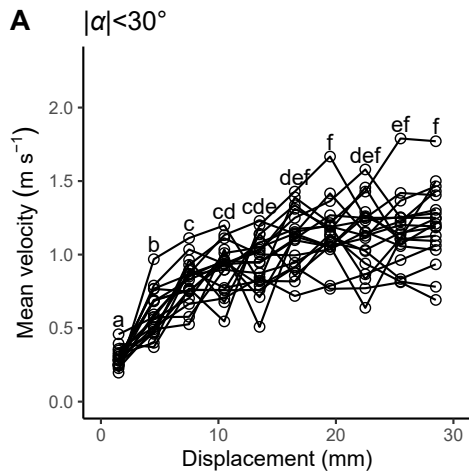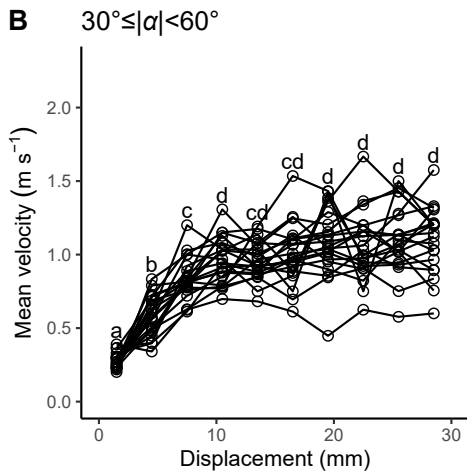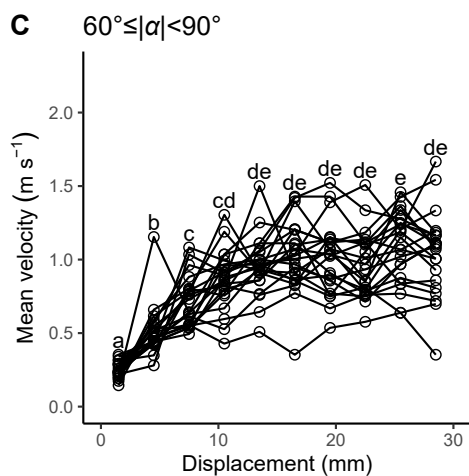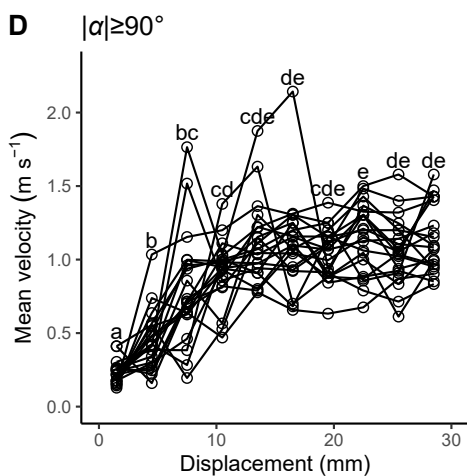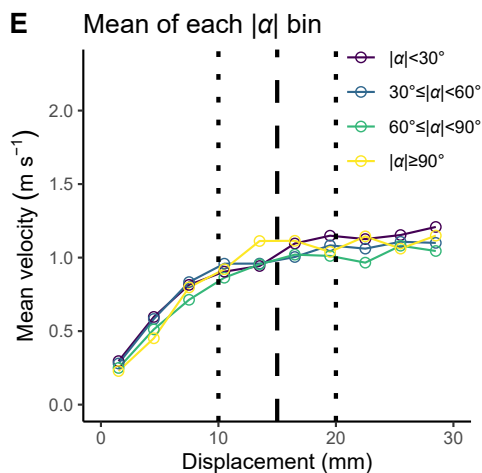

Supplement: supp [file elife-77699-supp-v1.zip]

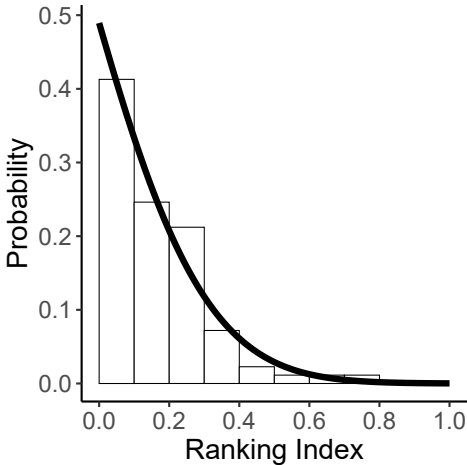

Supplement: supp [file elife-77699-supp-v1.zip]

Intersection  
point

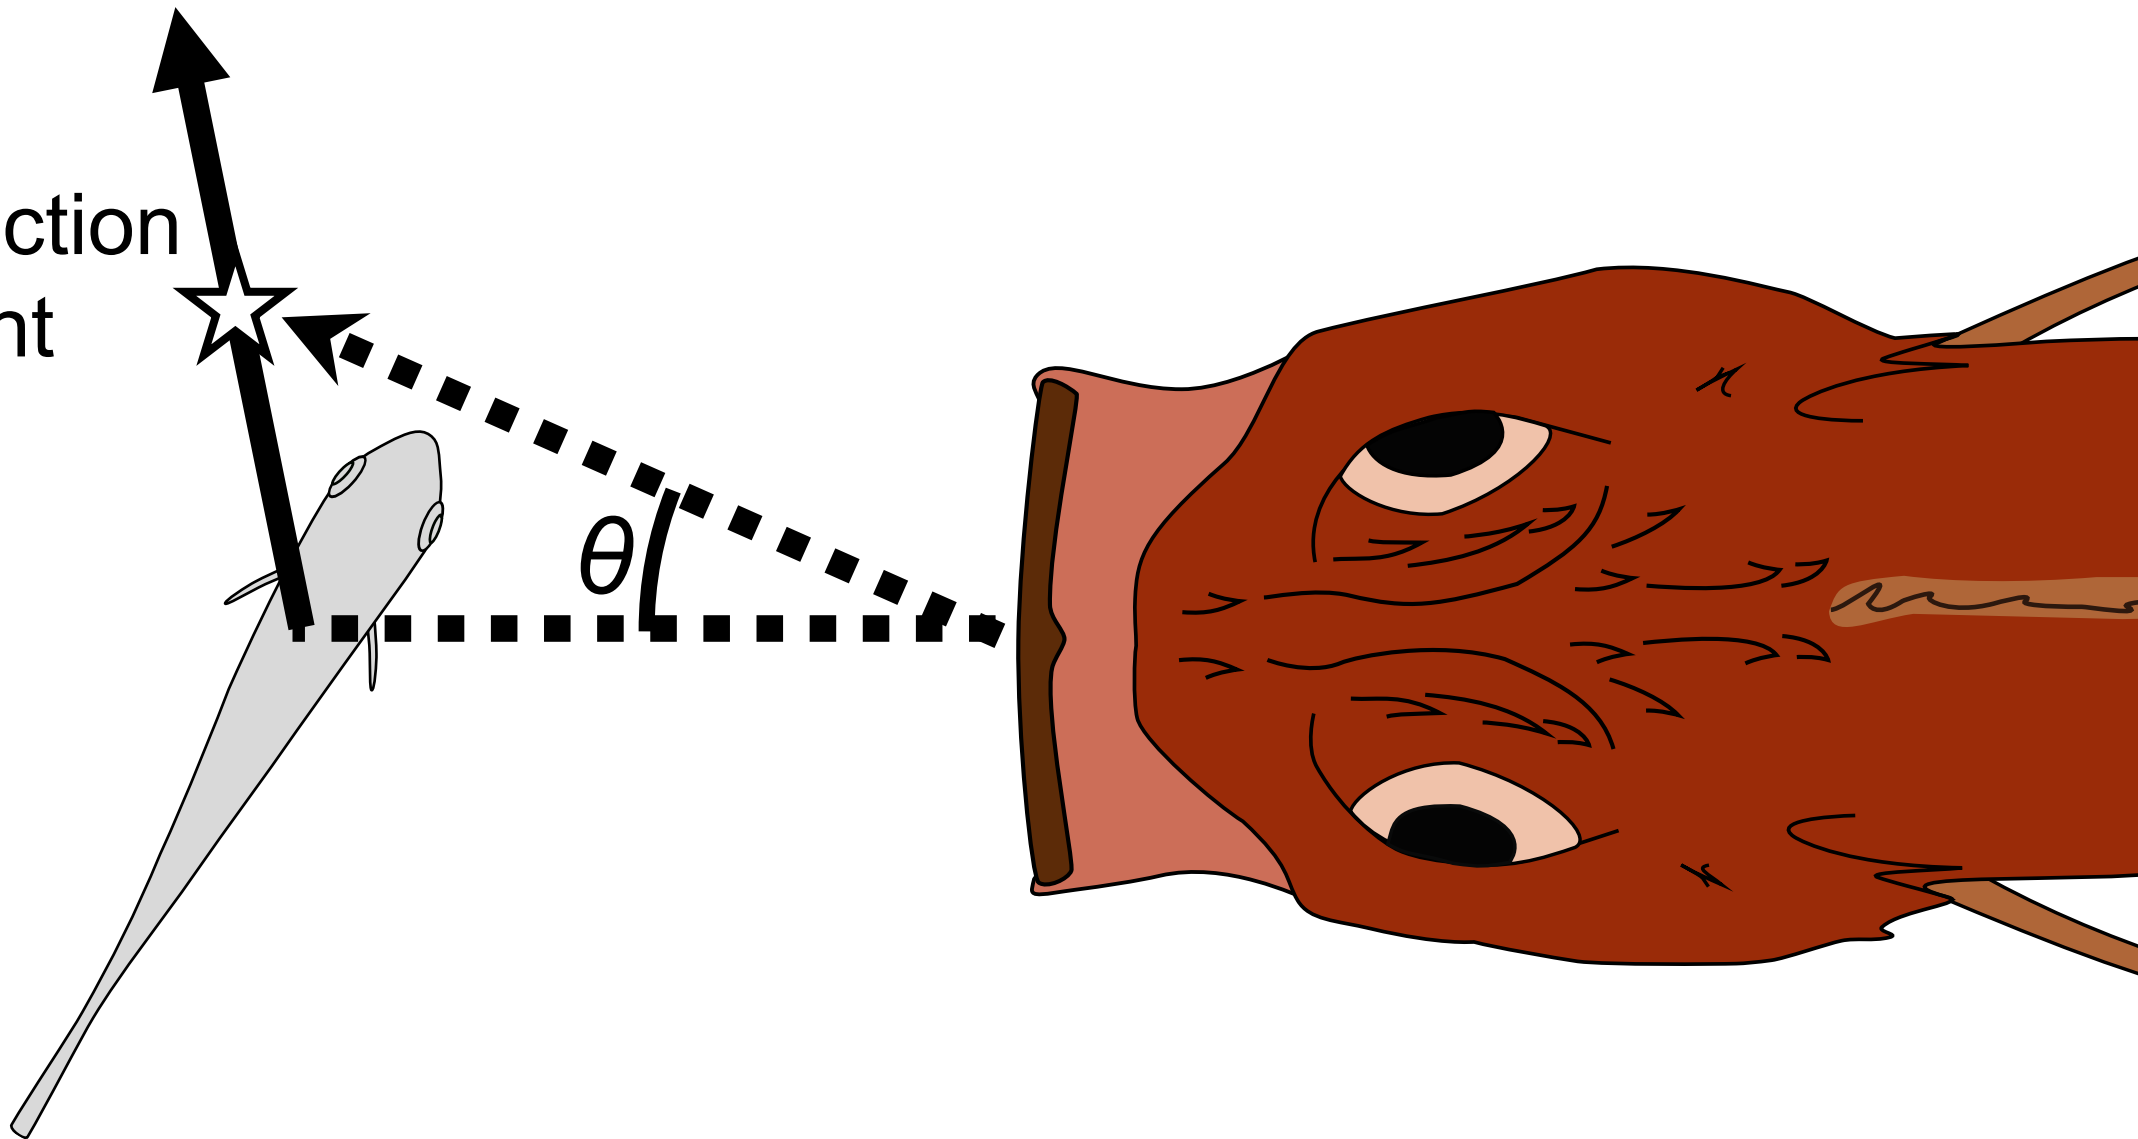

Supplement: supp [file elife-77699-supp-v1.zip]

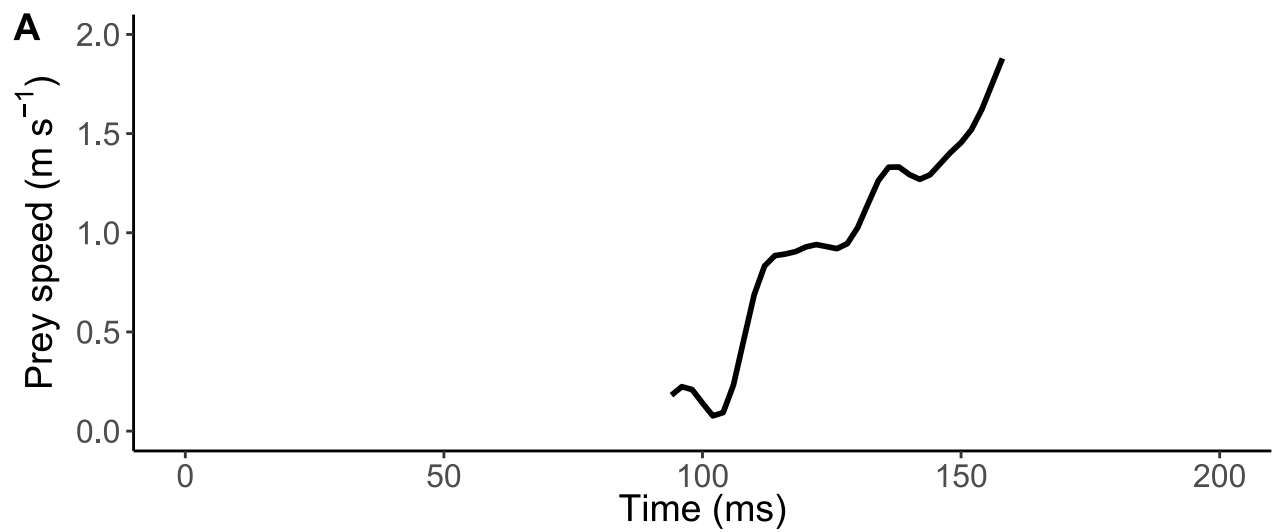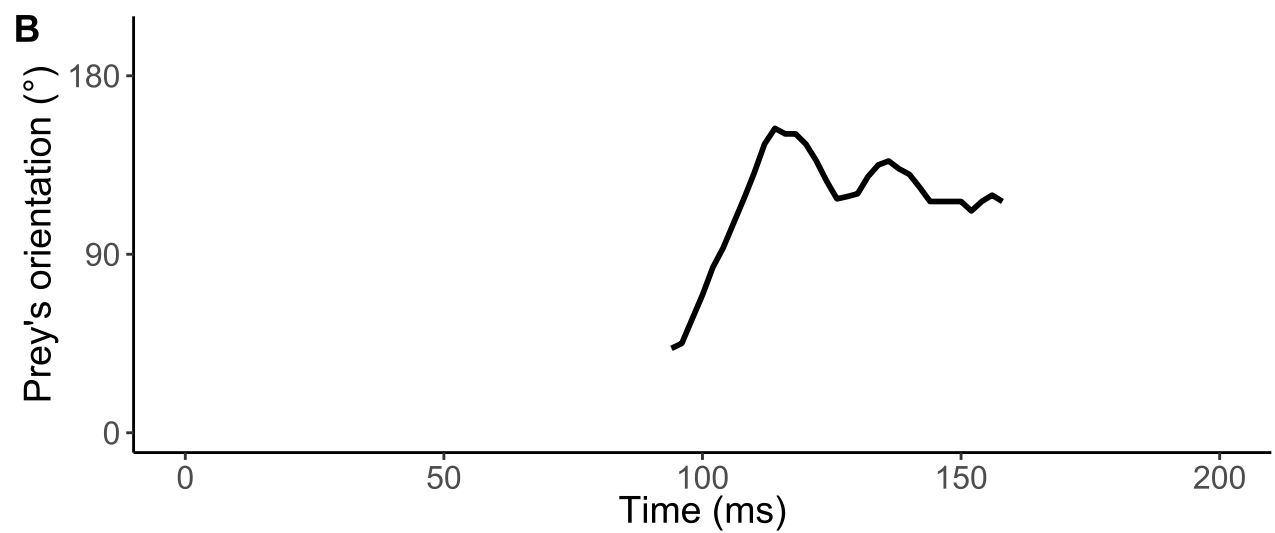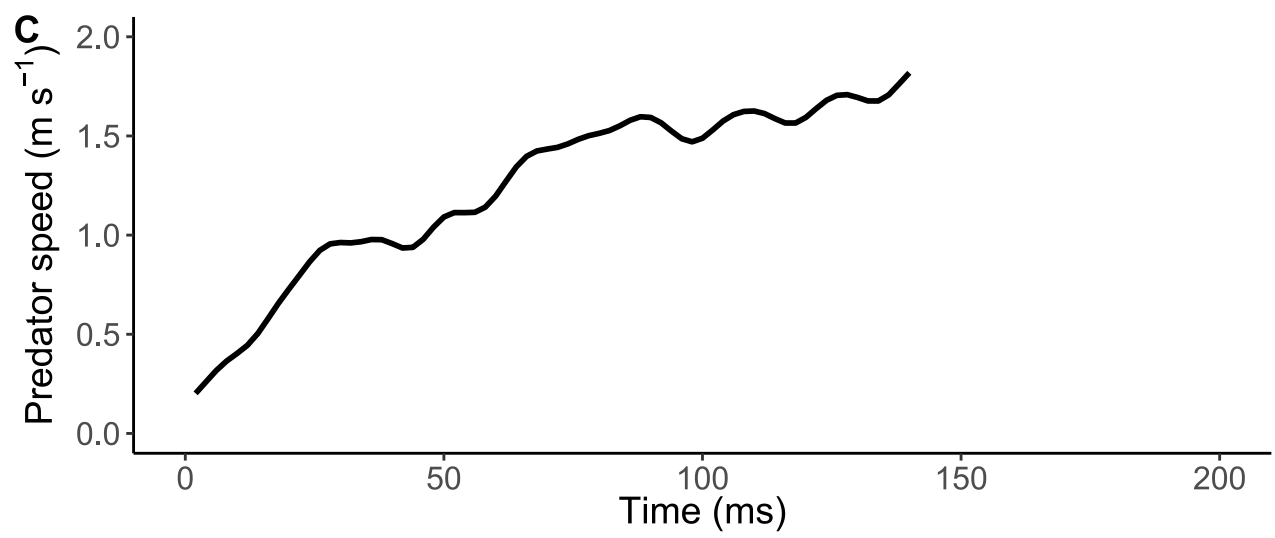

Supplement: supp [file elife-77699-supp-v1.zip]

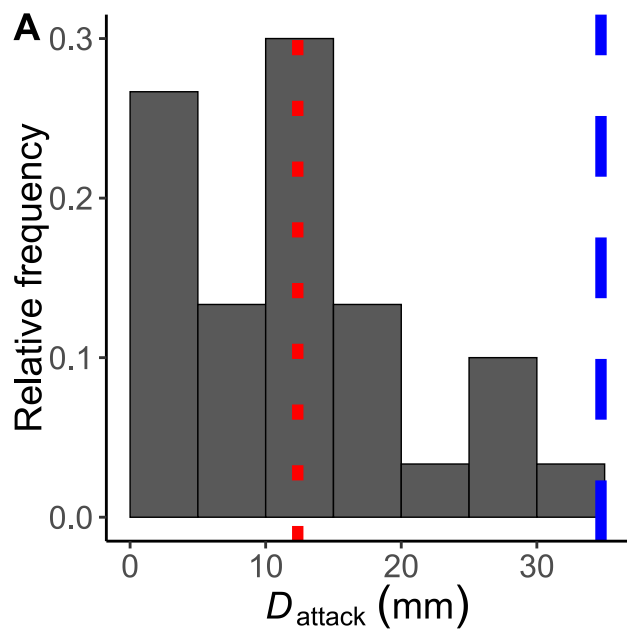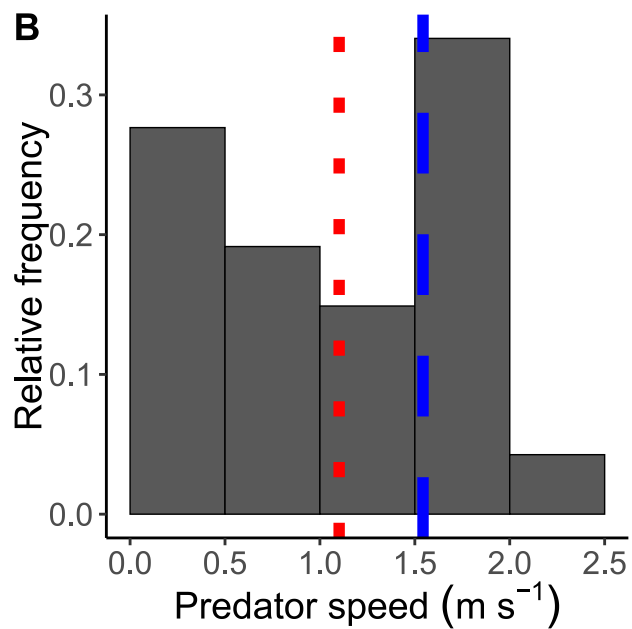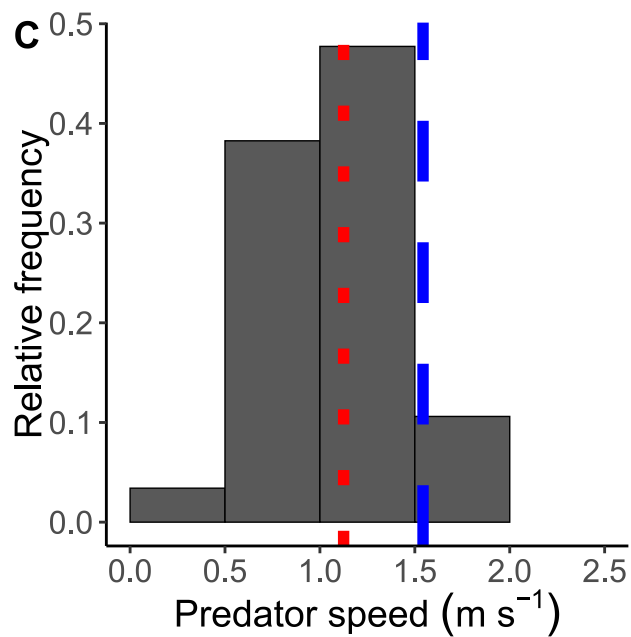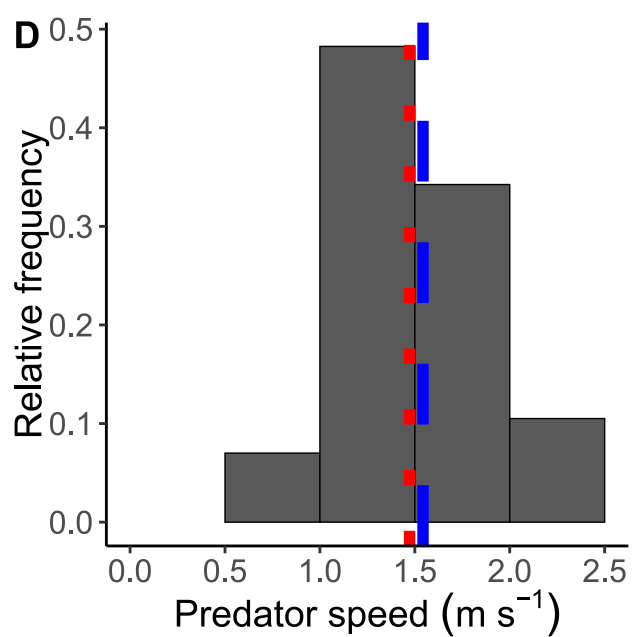

Supplement: supp [file elife-77699-supp-v1.zip]

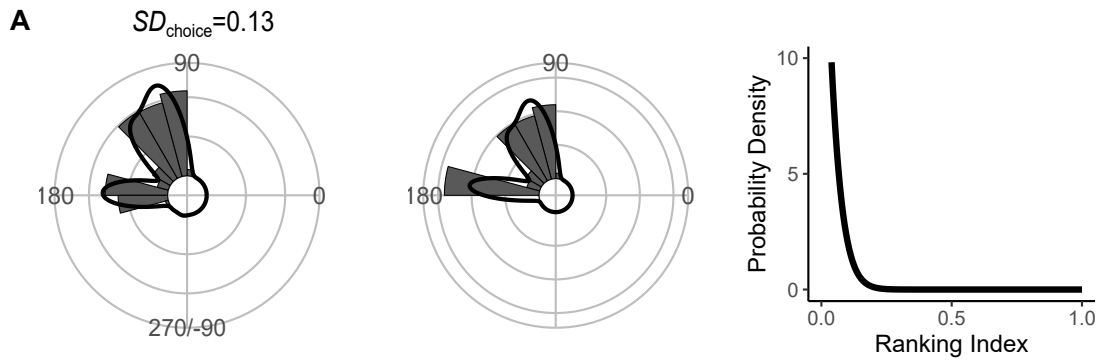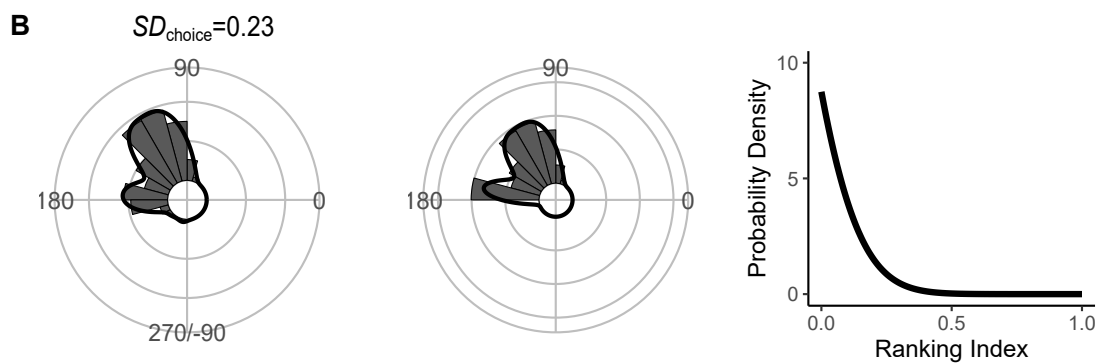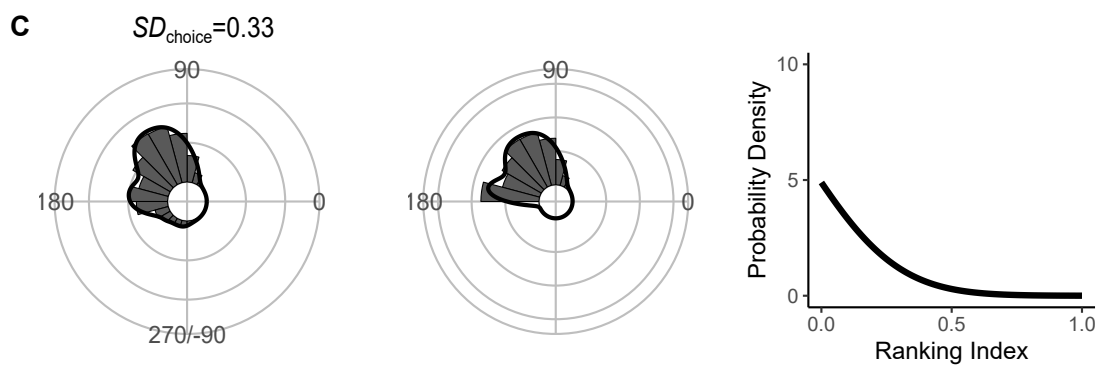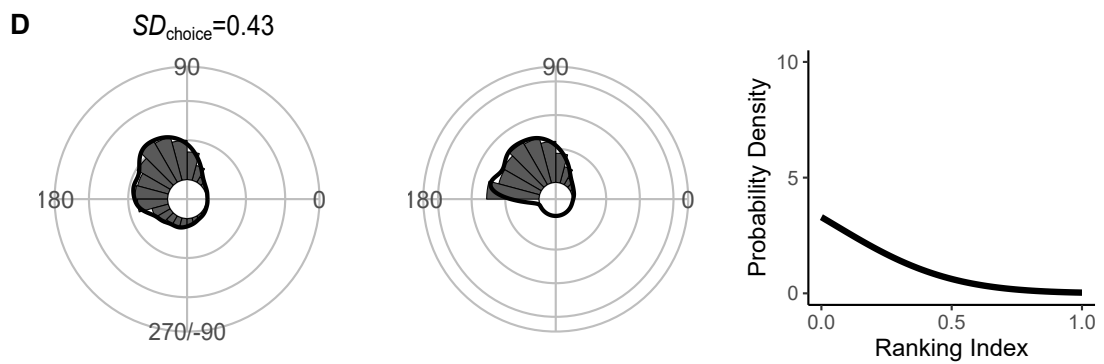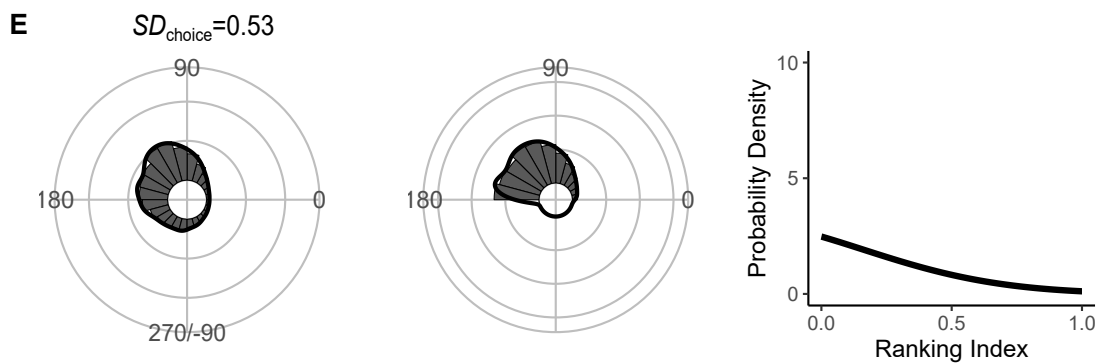

Supplement: supp [file elife-77699-supp-v1.zip]

**A** $K=0.3$ 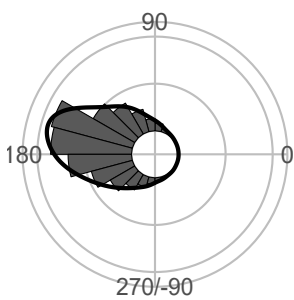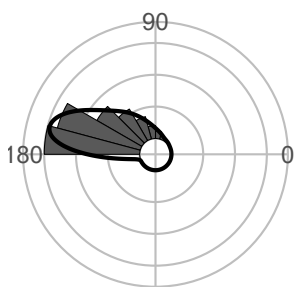**B** $K=1.2$ 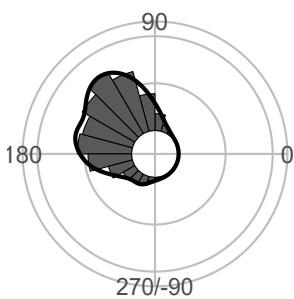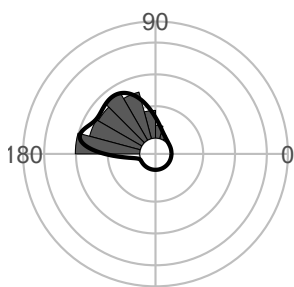**C** $K=1.48$ 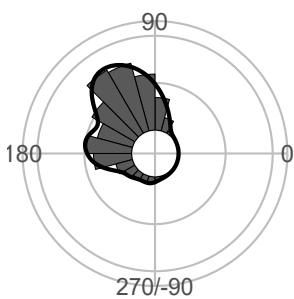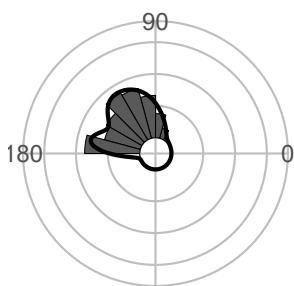**D** $K=1.8$ 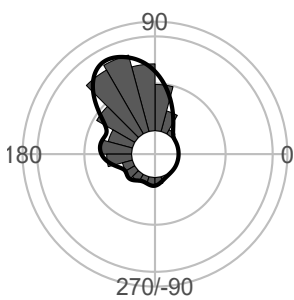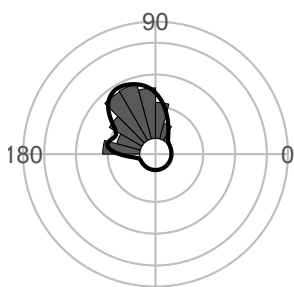**E** $K=7.5$ 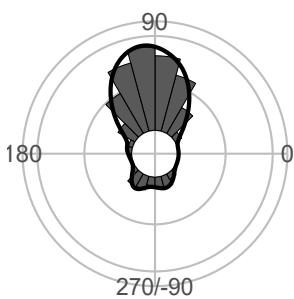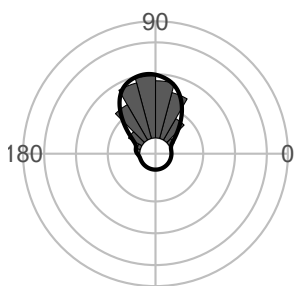

Supplement: supp [file elife-77699-supp-v1.zip]
